# Supplementary material for: Convergent evolution of diverse Bacillus anthracis outbreak strains toward altered surface oligosaccharides that modulate anthrax pathogenesis
Source: PubMed Central journal article supplement (PMC7793302; doi:10.1371/journal.pbio.3001052), 2020-12-28
Supplement: pbio.3001052.s004.pdf [file pbio.3001052.s004.pdf]

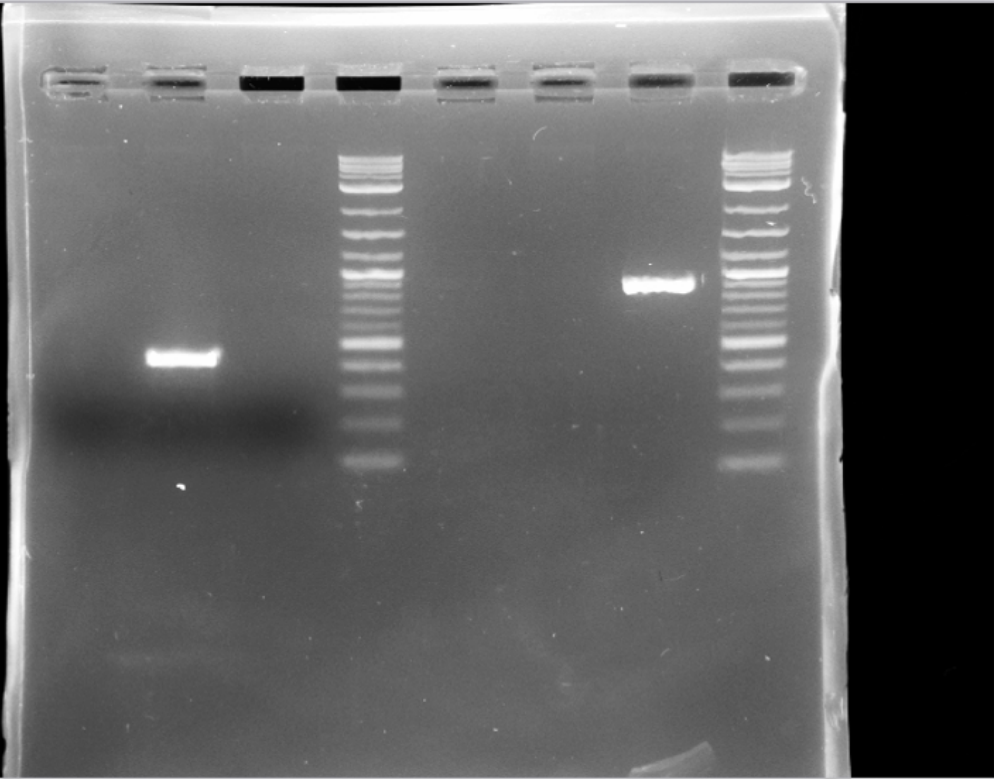

Fig 2D and 2E

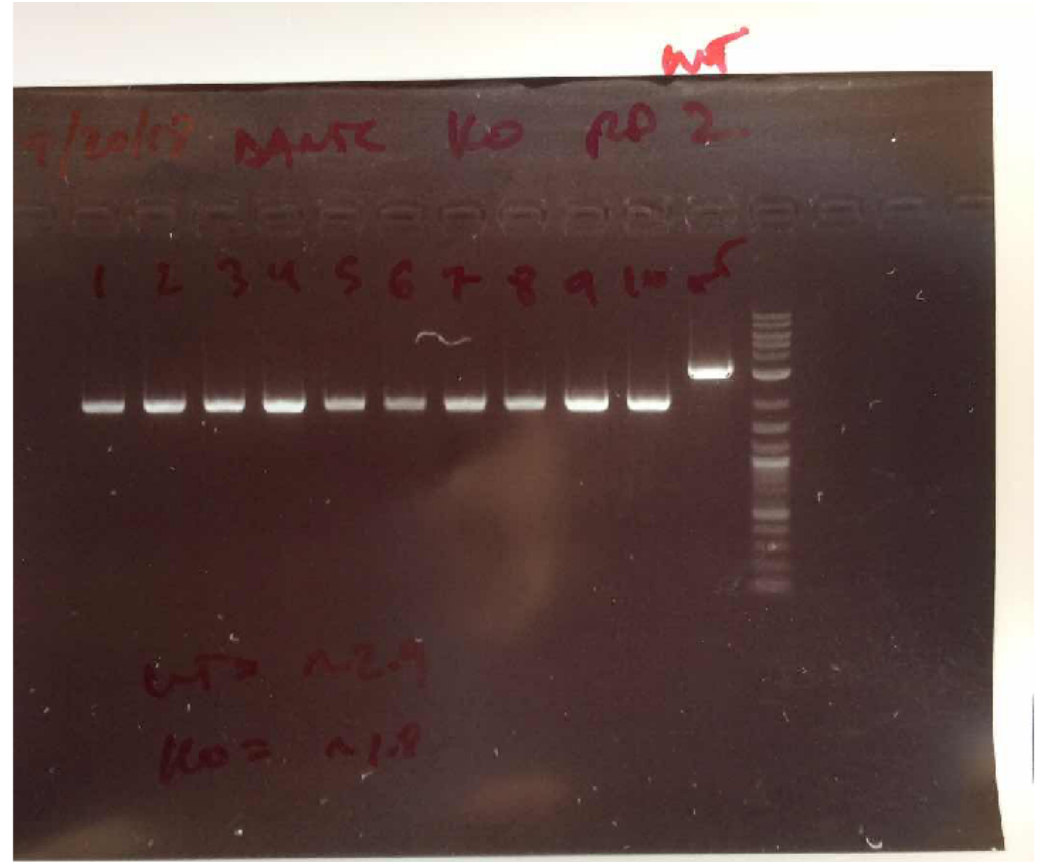

S1 Fig.
